# Supplementary material
Source: MDPI journal article supplement (https://www.mdpi.com/2072-4292/13/8/1478)
Supplement: s1 [file s1]

## Supplementary file

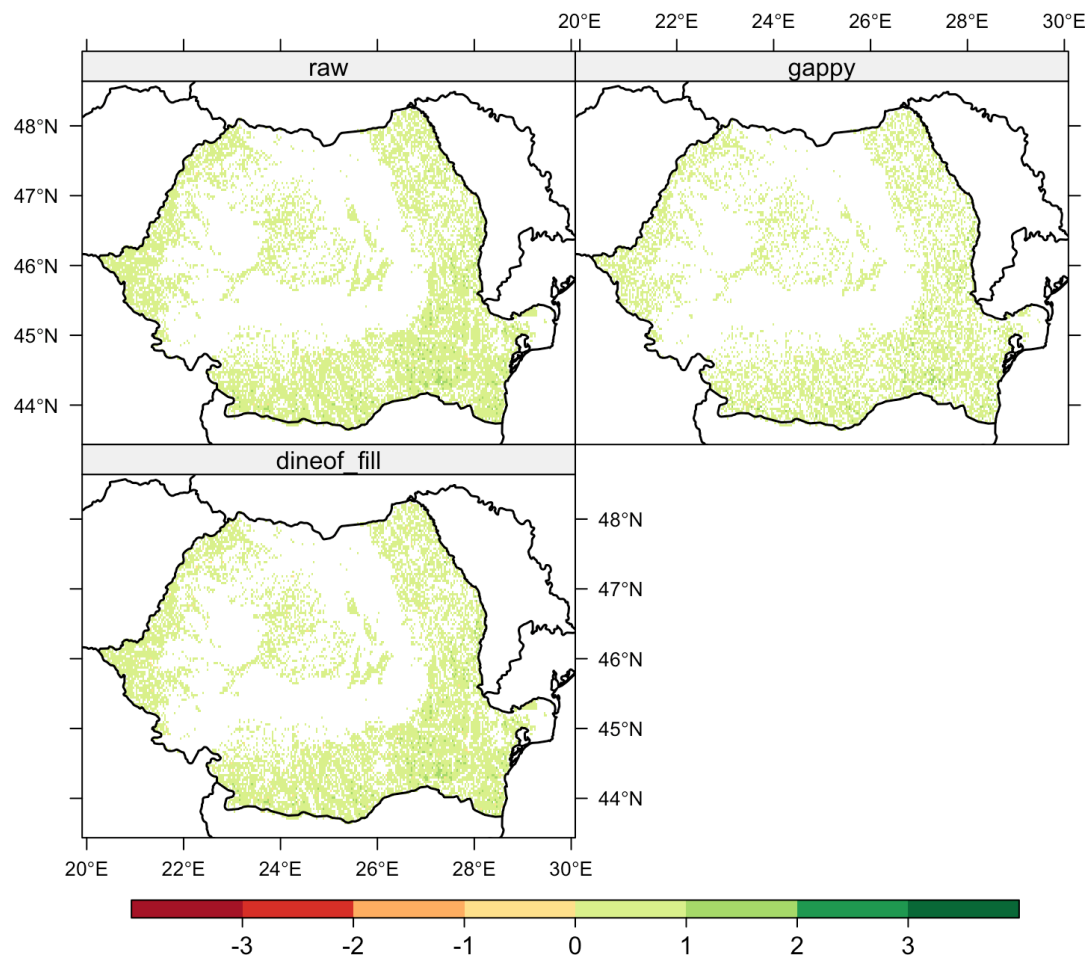

Figure S1 The maps of the original (top-left), artificially gaps (top-right) and dineof filling gaps (bellow left) of 241 -2012 composite

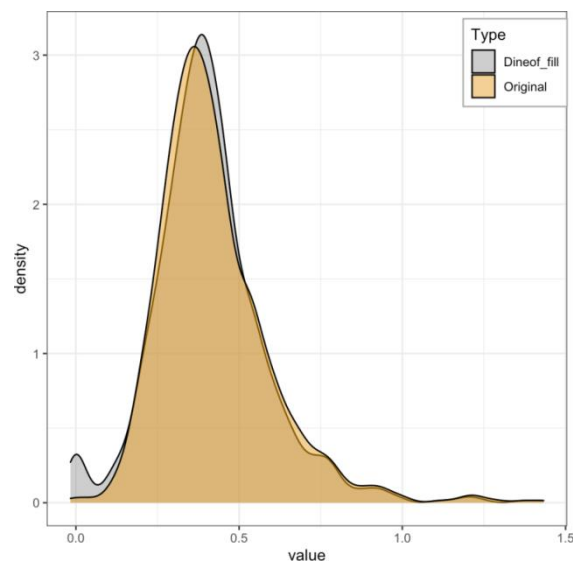

Figure S2 The density distribution of the original (orange) and gap-filled(gray) pixels

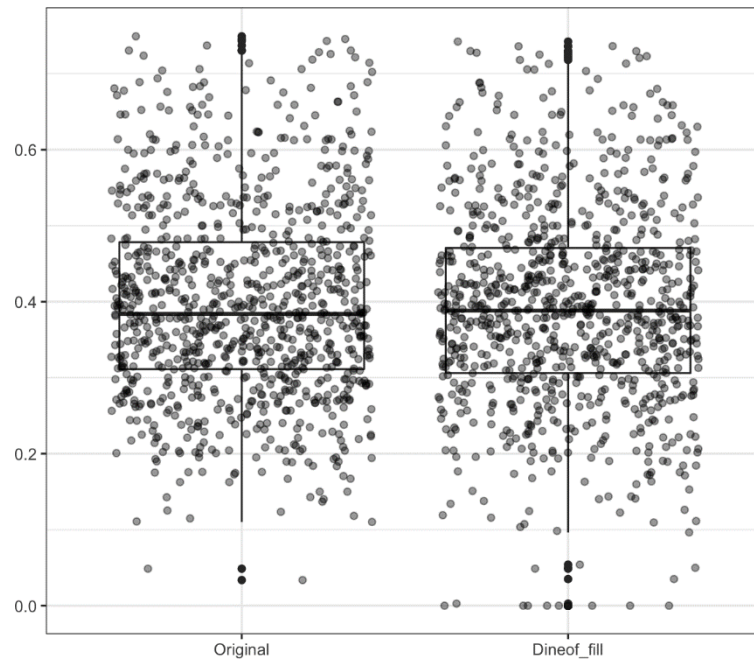

Figure S3 The boxjitterplot of the original (left) and gap-filled (right) pixels

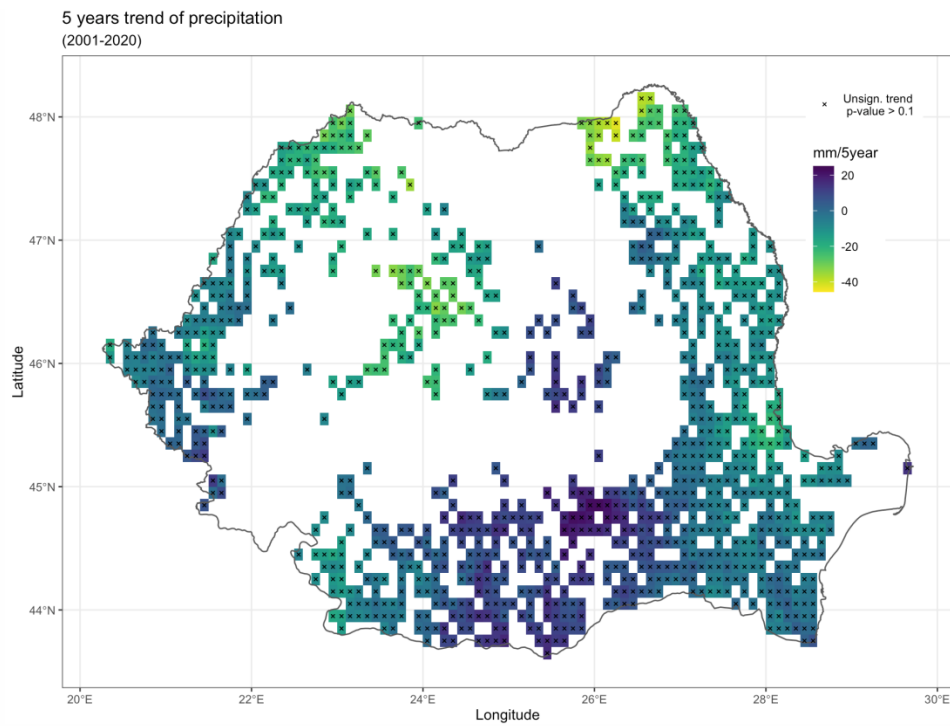

Figure S4 Sen's slope trend for precipitation amount (6 of March- 13 of September) between 2001 and 2020 (no significant values at  $p < 0.10$ )

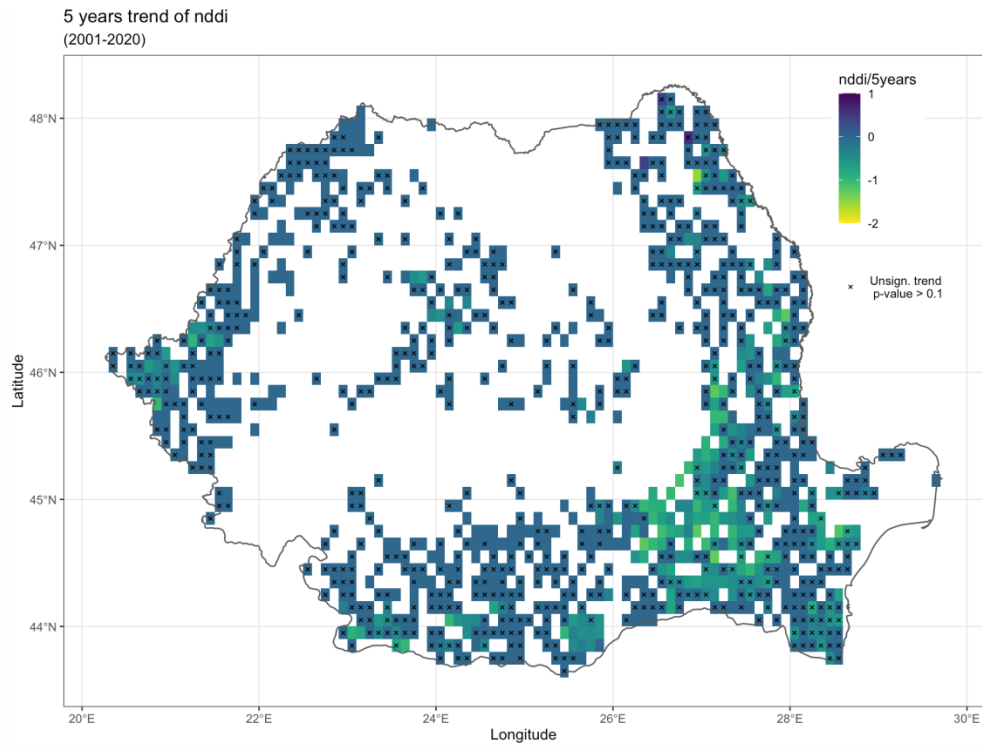

Figure S5 Sen'slope trend for drought frequency (6 of March- 13 of September) derived from NDDI between 2001 and 2020 (sparse significant values, especially in the south-east of Romania)
